# Supplementary material
Source: Springer Nature journal article supplement (https://www.springermedizin.de/resource/supplementary/13256_2010_1444_MOESM2_ESM.pdf/9648886)

TP -8.0  
IMA 17  
SEQ 17

R

kV 130  
mA 83  
TI 3.0  
GT 0.0  
SL 3.0  
185 0/-119  
AH90 S0  
001 903

SNP/BA/RJ

10  
C  
M

W 2000  
C 0

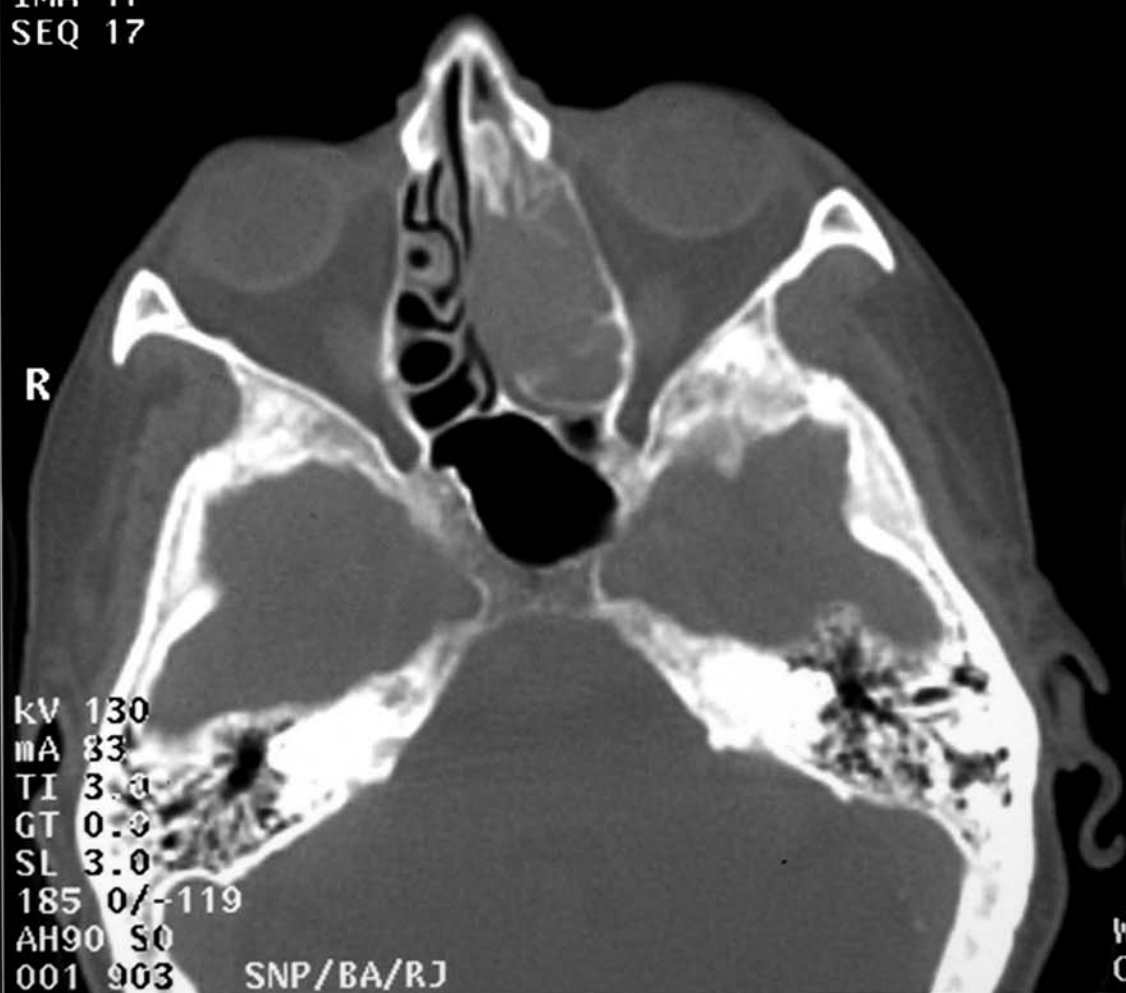

Supplement: MOESM2 [file 9648886]
